# Supplementary material for: 1D copper nanowires for flexible printable electronics and high ampacity wires
Source: Royal Society of Chemistry journal article supplement (doi:10.1039/c7nr02478a), 2017-01-01
Supplement: c7nr02478a1.pdf [file c7nr02478a1.pdf]

# 1D Copper nanowires for flexible printable electronics and high ampacity wires.

*A. Aziz<sup>1\*†</sup>, T. Zhang<sup>2†</sup>, Y. H. Lin<sup>2</sup>, F. Daneshvar<sup>2</sup>, H.J. Sue<sup>2\*</sup>, and M. E. Welland<sup>1</sup>*

1. Nanoscience Centre, University of Cambridge, CB3 0FF, UK.

2. Polymer Technology Centre, Texas A&M University, College Station, TX 77843 USA

## Supporting Information

The additional SEM images of the Cu nanocrystals synthesized with different molar ratio of  $\text{CuCl}_2$ :glucose:HDA:KBr were shown in Figure S1. With a molar ratio of HDA: $\text{Br}^-$  larger than the optimal ratio 3:1, a mixture of CuNWs and Cu nanoparticles were obtained (3:0.25, 3:0.5 and 4.5:1), indicating an insufficient capping on Cu seeds. For these cases, the smaller concentration of  $\text{Br}^-$  increased the chances that multi-twinned seeds develop to single-crystal seeds. In contrast, overdosing  $\text{Br}^-$  in the precursor solution caused unwanted capping on {110} and {111} facets, which produced Cu plates as demonstrated using a HDA: $\text{Br}^-$  ratio of 2.5:2. An additional SEM image with lower magnification for 1:1:3:1 was also included.

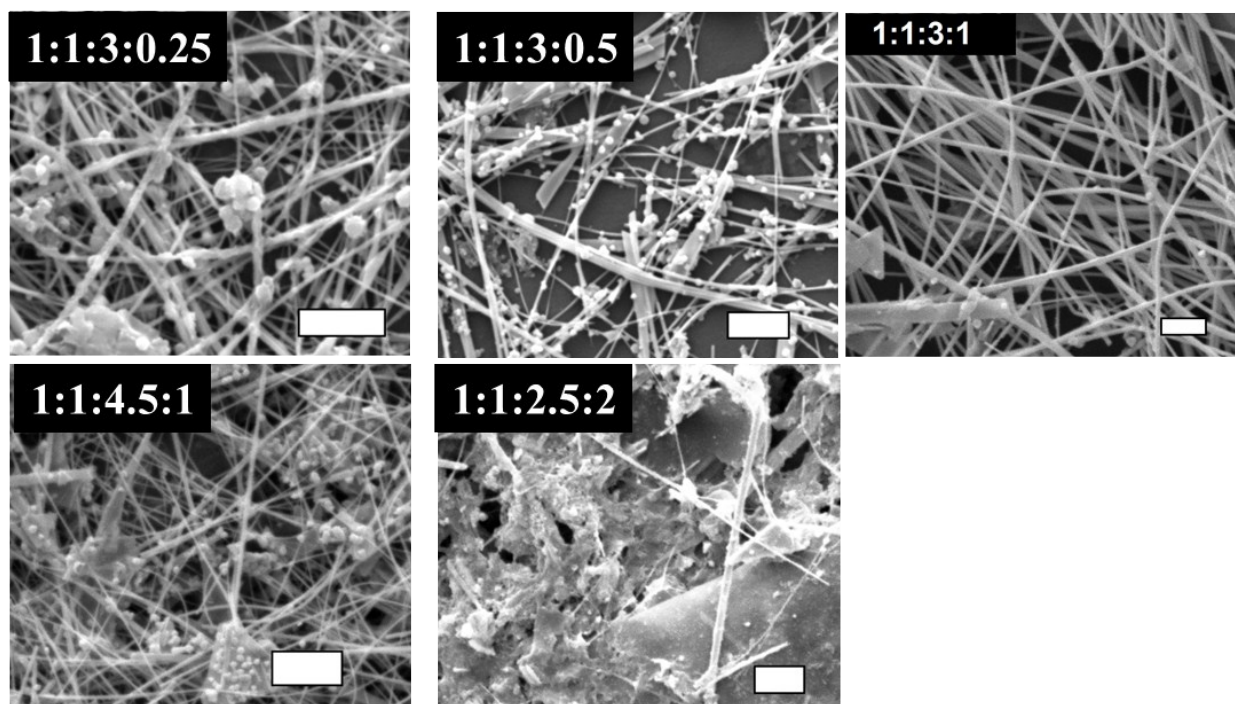

**Figure S1.** SEM images of the Cu nanocrystals synthesized with different molar ratio of  $\text{CuCl}_2$ :glucose:HDA:KBr. Bar = 2  $\mu\text{m}$ .

## Contribution of Pt Contact resistance:

Figure S2a shows the resistance of the CuNW1, CuNW2 and CuNW3 as a function of their length. Figure S2b shows the IV curves of these nanowires. The x-intercept in Figure S2a is  $11\Omega$ . If the resistance value of CuNW1, which has a slightly larger diameter than CuNW 1 and CuNW2, is not fit, the contact resistance is  $9\Omega$  (dashed line). The use of  $11\Omega$  can overestimate the contact resistance. Therefore, for more realistic calculation, the conductivity values shown in Table 1 are obtained using  $9\Omega$  Pt contact resistance. From S2b, the resistance of CuNW1, CuNW2 and CuNW3 are  $34.8\Omega$ ,  $29.6\Omega$ , and  $20.4\Omega$  respectively. After subtracting the  $9\Omega$  contact resistance, the resistances of only the copper nanowires CuNW1, 2 and 3 are  $25.8\Omega$ ,  $20.6\Omega$  and  $11.4\Omega$  respectively. Using the relation  $\sigma = L/R(\pi r^2)$ , where L is the length and r is the radius of the CuNW. the electrical conductivity of CuNW1, 2 and 3 are  $3.5 \times 10^5$  S/cm,  $3.4 \times 10^5$  S/cm, and  $3.4 \times 10^5$  S/cm, respectively.

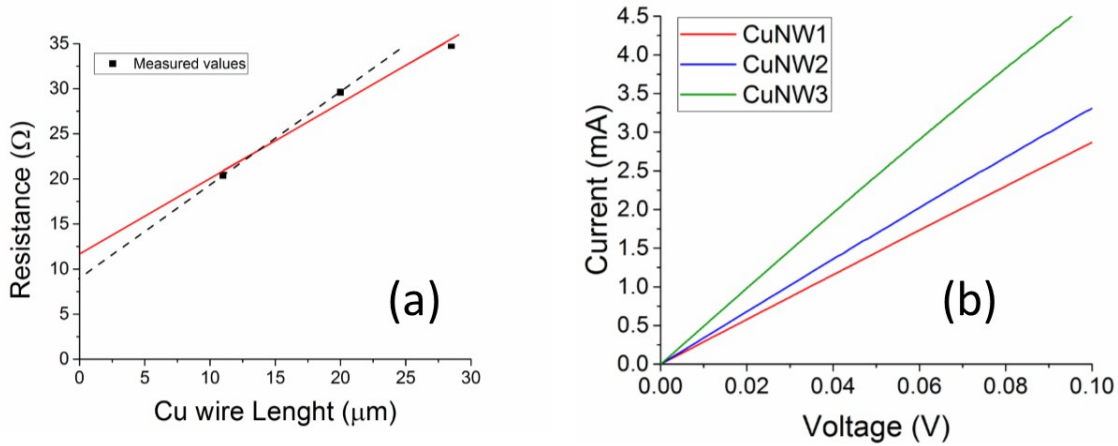

**Figure S2.** (a) Resistance vs CuNW length for devices CuNW1, CuNW2 and CuNW3. (b) IV curves of CuNW1, CuNW2 and CuNW3.

## FIB deposited Pt:

To find the electrical conductivity of the Focused Ion Beam (FIB) deposited Pt contact pads, a 1  $\mu\text{m}$  wide and 200nm thick Pt wire was deposited between the gold electrodes using FIB, as shown in figure S3b.

The distance between the gold electrodes is 24.3 $\mu\text{m}$ . The resistance and the electrical conductivity of the Pt wire are 2.6k $\Omega$  and  $4.7 \times 10^2 \text{ S/cm}$  respectively.

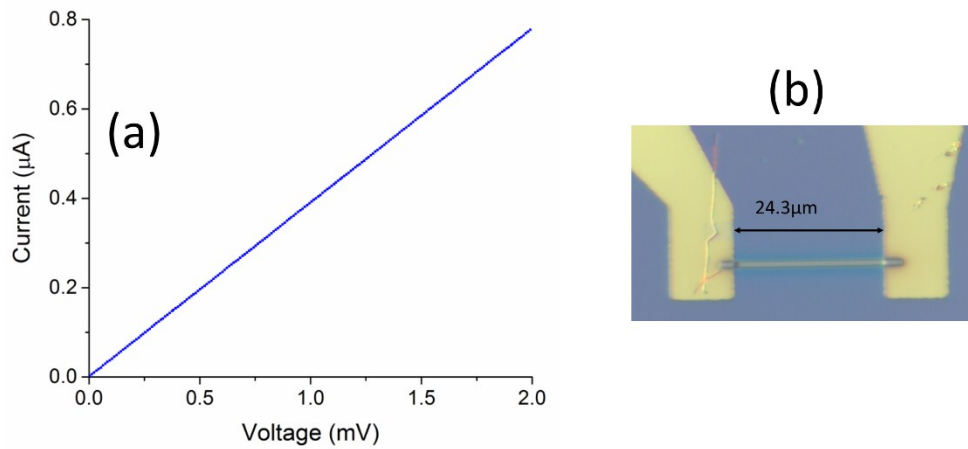

**Figure S3:** (a) IV curve of the Pt wires, shown in (b). (b) Pt wires deposited between gold electrodes. Length 24.3 $\mu\text{m}$ , width 1 $\mu\text{m}$ , thickness 200nm.
